# Supplementary material for: Family Satisfaction with the End-of-life discussions and resuscitation orders for patients with severe COVID-19: A multicenter study in Saudi Arabia
Source: Research Square preprint supplement (doi:10.21203/rs.3.rs-6212653/v1), 2025-05-07
Supplement: Supplementary file 1 [file d14433caa74a3a86fbf40b27.pdf]

**Supplementary information**  
**The Prospective Survey Questionnaire with the Family member**  
**The English version**

Serial No.

| Demographics                                                                                                                                                                                                       | Parameter                                                                                                                                                                                                     |
|--------------------------------------------------------------------------------------------------------------------------------------------------------------------------------------------------------------------|---------------------------------------------------------------------------------------------------------------------------------------------------------------------------------------------------------------|
| 1. Age of the family member (years)                                                                                                                                                                                |                                                                                                                                                                                                               |
| 2. Sex                                                                                                                                                                                                             | - <input type="checkbox"/> Male<br>- <input type="checkbox"/> Female                                                                                                                                          |
| 3. Nationality:<br>- Saudi<br>- Non-Saudi (state country):                                                                                                                                                         | Please tick <input checked="" type="checkbox"/><br>- <input type="checkbox"/><br>- <input type="checkbox"/> State:                                                                                            |
| 4. Religion:<br>a. Muslim<br>b. Others (state):                                                                                                                                                                    | Please tick <input checked="" type="checkbox"/><br>- <input type="checkbox"/><br>- <input type="checkbox"/> State:                                                                                            |
| 5. Level of Education:                                                                                                                                                                                             | - <input type="checkbox"/> Elementary<br>- <input type="checkbox"/> Intermediate<br>- <input type="checkbox"/> Secondary<br>- <input type="checkbox"/> University<br>- <input type="checkbox"/> Post-Graduate |
| 6. City of residence                                                                                                                                                                                               | - <input type="checkbox"/> Riyadh<br>- <input type="checkbox"/> Western region<br>- <input type="checkbox"/> Eastern Region<br>- <input type="checkbox"/> Others (state):                                     |
| <b>The questionnaire</b>                                                                                                                                                                                           |                                                                                                                                                                                                               |
| 1. Did the physicians communicate with you regarding the medical condition of the patient)?                                                                                                                        | <input type="checkbox"/> -Yes<br><input type="checkbox"/> -No                                                                                                                                                 |
| 2. How did the physicians communicate with you? (Please tick <input checked="" type="checkbox"/> )                                                                                                                 | a. - <input type="checkbox"/> Directly in person,<br>b. - <input type="checkbox"/> By phone<br>c. - <input type="checkbox"/> Telecommunication<br>d. - <input type="checkbox"/> Another (state):              |
| 3. How satisfying was the communication process in terms of the following aspects:<br><br>a. Adequacy of information given.<br>b. Time given for the communication.<br>c. The empathy during delivery of bad news. | Mark from 1 (not satisfied, 2 somewhat dissatisfied, 3 Neutral, 4: somewhat satisfied, 5 very satisfied)<br><br>Doctors ( ) Nurses ( )<br>Doctors ( ) Nurses ( )<br>Doctors ( ) Nurses ( )                    |

|                                                                                                                                                                                                                                                                                                                                             |                                                                                                             |
|---------------------------------------------------------------------------------------------------------------------------------------------------------------------------------------------------------------------------------------------------------------------------------------------------------------------------------------------|-------------------------------------------------------------------------------------------------------------|
| <p>4. Did the patient express any opinions or wishes regarding the kind of care during a critical illness?</p> <p>a. Yes:</p> <p>    i. What were his wishes?</p> <p>    ii. Was this documented?</p> <p>    iii. If yes, how? e.g. well</p> <p>    iv. Did physicians discuss these with the family?</p> <p>b. No</p> <p>c. I do know.</p> | <p>-Yes ( ) -No ( ) -Don't know</p> <p>-Yes ( ) -No ( ) -Don't know</p> <p>-Yes ( ) -No ( ) -Don't know</p> |
| <p>5. If not, did the family/next of kin have an opinion or wish regarding this?</p> <p>a. Yes,</p> <p>    i. What were they/</p> <p>    ii. Was it documented?</p> <p>    iii. If yes, how?</p> <p>b. No,</p> <p>c. I do not know</p>                                                                                                      |                                                                                                             |
| <p>6. Did the medical team inform the patient about the nature of his disease and the prognosis?</p> <p>a. Yes</p> <p>b. No:</p> <p>c. If no, why?</p> <p>    i. Too ill</p> <p>    ii. Doctors did not talk about this</p> <p>    iii. Other reasons, state:</p>                                                                           |                                                                                                             |
| <p>7. Did physicians speak to a relative about diagnosis and prognosis of the patient?</p> <p>a. Yes,</p> <p>b. No.</p> <p>c. If no, why?</p> <p>    i. Physicians did not talk to us.</p> <p>    ii. We did not ask.</p> <p>    iii. Other reasons (state:)</p>                                                                            |                                                                                                             |
| <p>8. Was the management strategy (i.e. supportive conservative palliative strategy versus an aggressive such as ventilation CPR, dialysis) discussed with:</p> <p>a. The patient?</p> <p>    If no, why?</p> <p>        i. Physicians did not discuss this</p>                                                                             | <p><input type="checkbox"/>-Yes      <input type="checkbox"/>-No</p>                                        |

|                                                                                                                                                                                                                                                                            |                                                                                                                                                                                                                                  |
|----------------------------------------------------------------------------------------------------------------------------------------------------------------------------------------------------------------------------------------------------------------------------|----------------------------------------------------------------------------------------------------------------------------------------------------------------------------------------------------------------------------------|
| ii. We did not ask.<br>iii. Other reasons (state):<br>b. A member of the family?<br>If no, why?<br>i. Physicians did not discuss this<br>ii. We did not ask.<br>iii. Other reasons (state):                                                                                | <input type="checkbox"/> -Yes <input type="checkbox"/> -No<br><input type="checkbox"/> -Yes <input type="checkbox"/> -No                                                                                                         |
| 9. When the patient condition became critical as suitability of DNAR discussed with:<br>a. The patient?<br>b. a member of the family?<br>c. Another (state):                                                                                                               | <input type="checkbox"/> -Yes <input type="checkbox"/> -No<br><input type="checkbox"/> -Yes <input type="checkbox"/> -No                                                                                                         |
| 10. If the answer to Q:9 a or b is yes, did you feel the decision was:<br>a. Appropriate because it was consistent with patient's and family's wishes, values & goals.<br>b. Appropriate as we trust physicians' advice.<br>c. Inappropriate<br>d. Another answer (state): | Choose one<br><br><input type="checkbox"/> -<br><br><input type="checkbox"/> -<br><br><input type="checkbox"/> - <input type="checkbox"/> -                                                                                      |
| 11. Did you manage to stay close with your relative in his final days: (tick ✓)                                                                                                                                                                                            | <input type="checkbox"/> -No<br><input type="checkbox"/> -Yes, how?<br>- Yes, stayed in the room.<br>- Yes, brief visit in the room<br>- Only by phone.<br>- Via Telecommunication.<br><input type="checkbox"/> Another (state): |

Thank you for your valid input. If you have any suggestions to improve future care of our patients, please state:

**Family/Next of kin survey: The Arabic version**

**نموذج عن التواصل بين الطبيب وقريب المريض (اللغة العربية)**

السلام عليكم ورحمة الله وبركاته،

أنا الدكتور \_\_\_\_\_ من مستشفى \_\_\_\_\_،

نود - ان أذنتم لنا - أن نتواصل معكم بشأن الرعاية الطبية التي تلقاها قريبكم رحمه الله وأسكنه فسيح جناته قبل وفاته،

ونعلم أن ذلك قد يجلب ذكريات عن أوقات عصيبة، ولكن الهدف هو الاستفادة من آرائكم ومقترحاتكم في تحسين الخدمة وتقديم رعاية طبية أفضل وتواصل أفضل مع المريض وأفاريه،

ستكون مدة المكالمة بين 10 - 15 دقيقة ويمكنكم تحديد وقت مناسب لاحقا اذا كان هذا الوقت غير ملائم أو ترشيح شخص آخر ملم بحالة قريبكم رحمه الله،

كما نؤكد أن كافة المعلومات ستبقى سرية ولن يشار الى أية معلومات تتعلق بهويتكم أو هوية المرحوم،

ولكم كافة الحرية بعدم المشاركة تماما أو عدم الاجابة عن بعض الأسئلة،

ولكم منا جزيل الشكر.

اسم قريب المريض: .....

أ- المعلومات الديموغرافية لقريب المريض

الرقم التسلسلي:

- 1- عمر القريب: ( ) سنة
- 2- الجنس: ذكر ( ) أنثى ( )
- 3- الجنسية: سعودي ( ) غير سعودي: ( ) - ماهي؟
- 4- الدين: مسلم ( ) آخر: ( )
- 5- المستوى التعليمي (أعلى شهادة): - ابتدائي ( ) - متوسط ( ) - ثانوي ( )
- جامعي ( ) - ماجستير أو دكتوراه ( )
- 6- منطقة السكن: - الوسطى ( ) - الغربية ( ) - الشرقية ( ) - أخرى (الذكر):

ب- الاستبيان

- 1- هل تواصل معكم الأطباء بشأن الوضع الطبي لقريبكم رحمه الله؟ - نعم ( ) - لا ( )
- 2- إذا الإجابة بنعم، كيف تم ذلك: (ممكن أكثر من إجابة)
- عبر لقاء مباشر مع الأطباء ( )
- عبر التلفون ( )
- التواصل المرئي ( )
- وسائل أخرى (حدد):
- 3- حدد مدى رضاك عن عملية التواصل مع الفريق الطبي في الأوجه التالية
- (حيث 1 = غير راض أبداً، 2 = غير راض نوعاً ما، 3 = محايد، 4 = راض نوعاً ما، 5 = راض تماماً)
- | الأطباء | التمريض |
|---------|---------|
| ( )     | ( )     |
| ( )     | ( )     |
| ( )     | ( )     |
- كفاية المعلومات التي أعطيت لكم عن وضع المريض
- كفاية الوقت الذي أعطي لكم لشرح وضع قريبكم
- التعاطف و التفهم من الفريق الطبي عند نقل الأخبار الغير جيدة عن قريبكم ( )
- 4- هل سبق لقريبكم قبل أو أثناء مرضه أن عبر عن أية معلومات حول نظرته ورغباته في نوعية الرعاية الطبية التي يود أن يتلقاها فيما لو أصبح في حالة خطيرة وحرارة؟
- نعم ( ) - لا ( ) - لا أعلم ( )
- إذا الإجابة (نعم):
- ما هي؟
- وهل تم توثيقه؟
- وكيف؟ (مثلاً بوصية)
- هل ناقش الفريق الطبي معكم رغبات المريض؟ - نعم ( ) - لا ( ) - لا أعلم ( )
- 5- إذا لم يعبر قريبكم عن أية آراء، هل كان لأقربائه آراء خاصة تجاه ذلك؟
- نعم ( )

- ماهي؟
- هل تم توثيقها؟
- وكيف؟
- لا ( )
- لا أعلم ( )

6- هل أخبر الفريق الطبي قريبكم المريض عن تشخيص مرضه ومدى احتمالات الشفاء ومسار المرض (prognosis)؟

- نعم ( )
- لا ( )
- إذا (لا) ماهو السبب؟
- حالته لا تسمح ( )
- لم يفتح الأطباء الموضوع ( )
- أسباب أخرى (أذكرها):

7- هل أخبر الفريق الطبي أحد أقرباء المريض عن تشخيص مرضه ومدى احتمالات الشفاء ومسار المرض (prognosis)؟

- نعم ( )
- لا ( )
- ماهو السبب؟
- لم يفتح الأطباء الموضوع ( )
- لم نسأل.
- أسباب أخرى (أذكرها):

8- هل ناقش الفريق الطبي خطة ونوعية العلاج والتدخلات والجراءات الطبية، وهل هي عادية وداعمة فقط أم تشمل إجراءات إضافية كالانعاش القلبي والتنفس الاصطناعي وغسيل الكلى وغيرها؟

- أ - مع المريض؟
- نعم ( )
- لا ( )
- لا أعلم
- إذا لم يتم النقاش، ما هو السبب؟
- حالته لا تسمح ( )
- لم يفتح الأطباء الموضوع ( )
- لم نسأل.
- أسباب أخرى (أذكرها):

ب - مع أحد أفراد العائلة؟

- نعم ( )
- لا ( )
- لا أعلم
- إذا لم يتم النقاش، ما هو السبب؟
- حالته لا تسمح ( )
- لم يفتح الأطباء الموضوع ( )
- لم نسأل.
- أسباب أخرى (أذكرها):

9- عندما أصبحت حالة المريض حرجة وخطيرة، هل ناقش الفريق الطبي ملائمة إيقاف التدخلات والجراءات الطبية كالانعاش القلبي والتنفس الاصطناعي (DNAR) مع:

- المريض: نعم ( )
- لا ( )
- أحد أفراد العائلة: نعم ( )
- لا ( )

- آخر:

10- اذا كان الجواب (نعم)، ما هو شعور العائلة تجاه القرار : (الرجاء إختيار اجابة واحدة)

- وافقنا لأنّ ذلك يتماشى مع رغبات المريض وعائلته. ( )
  - وافقنا لأنّ المريض و العائلة تثق في الأطباء وقراراتهم. ( )
  - لم نوافق ورأيناه غير مناسب. ( )
  - رأي آخر: (يرجى ذكره): ( )
- الأسباب:.....

11- هل تمكنتم أو أحد أفراد العائلة من البقاء قريباً من قريبكم -رحمه الله - في أيامه الأخيرة ووقت وفاته؟

- نعم ( )
- لا ( )

- اذا الاجابة بنعم، كيف تم ذلك؟:

- البقاء معه في الغرفة نعم ( ) لا ( )
- زيارته لوقت وجيز في الغرفة نعم ( ) لا ( )
- عبر التلفون نعم ( ) لا ( )
- التواصل المرني نعم ( ) لا ( )

12- هل في رائيك الشخصي انه ينبغي على المستشفى السماح بالزيارة للمريض في ساعات حياته الأخيرة رغم احتمالية انتقال العدوى اثناء الزيارة؟: (الرجاء إختيار اجابة واحدة)

- نعم ( )
- لا ( )
- نعم لكن فقط اذا لديه مناعة أو أخذ التطعيم ( )
- ليس لدي رأي محدد ( )
- أخرى (اذكر):

ختاماً، نشكر لكم تعاونكم وندعو لقريبكم بالرحمة والمغفرة، وان كان لديكم أية ملاحظات أو مقترحات الرجاء ذكرها ونتمنى لكم التوفيق.  
اقتراحات:
